# Supplementary figures and images for: Normalisation genes for expression analyses in the brown alga model Ectocarpus siliculosus
Source: Springer Nature journal article supplement (doi:10.1186/1471-2199-9-75), 2008-01-01

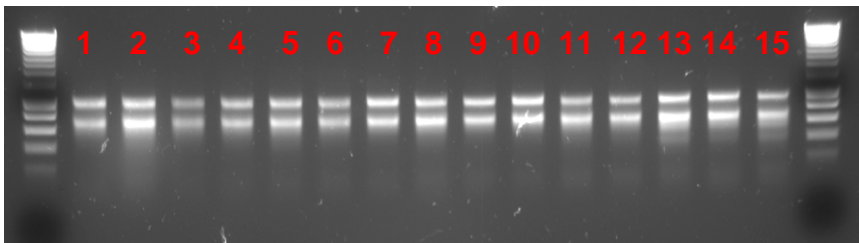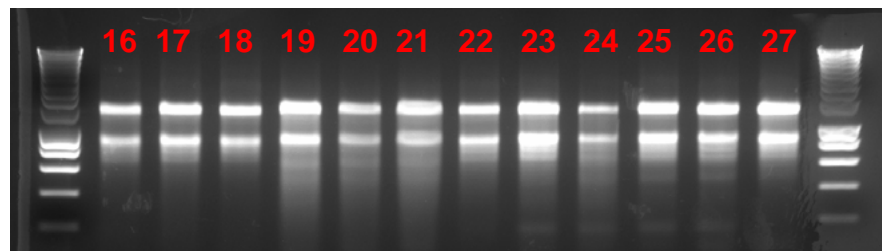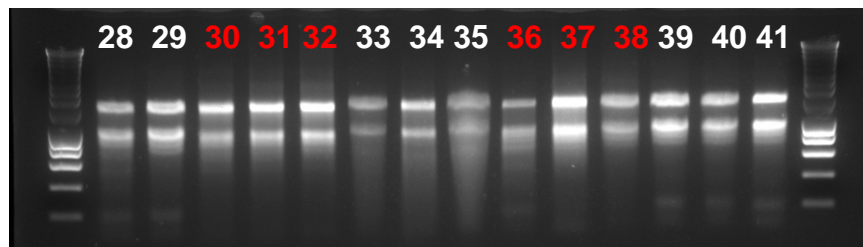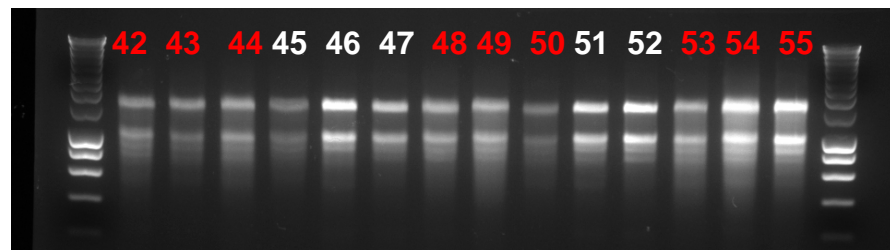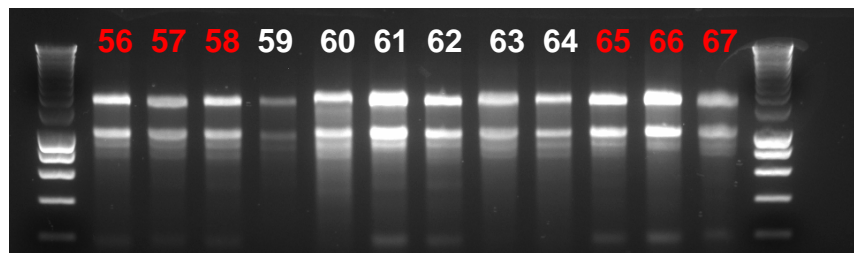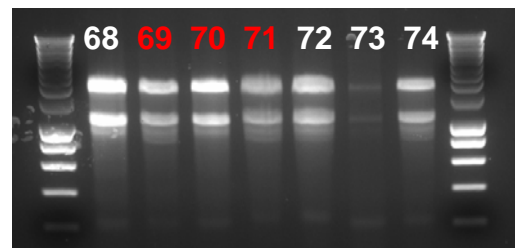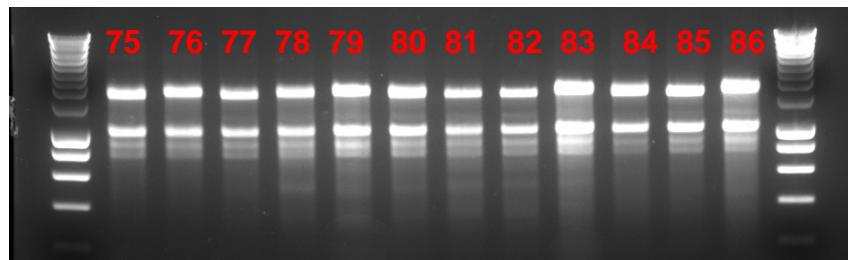

Supplement: Additional file 4 [file 1471-2199-9-75-s4.pdf]
